# Supplementary material for: Preexisting memory CD4+ T cells contribute to the primary response in an HIV-1 vaccine trial
Source: PubMed Central journal article supplement (PMC8631594; doi:10.1172/jci150823), 2021-12-01
Supplement: jci-131-150823-s070.pdf [file jci-131-150823-s070.pdf]

## SUPPLEMENTAL MATERIALS

### Study design

The data reported in this manuscript were generated from a substudy of the HVTN 106 trial, which was a phase 1, multicenter, randomized, double-blinded trial of three different HIV-1 Env immunizations (clinicaltrials.gov NCT02296541). These vaccines were delivered as DNA formulations encoding the gp160 Env protein from a clade B transmitted founder virus (T/F B.1059, HV13288) (NatB), the gp160 Env protein from the group M consensus virus (HV13287) (ConS), or a trivalent gp160 Env protein (HV13284, HV13285, and HV13286) designed for optimal global coverage (Mosaic)(1). Each vaccine was administered intramuscularly at a dose of 4mg DNA on day 0 (V2), day 28 (V4), and day 56 (V6). Volunteers were then boosted with an intramuscular immunization on day 112 (V8) and day 224 (V10) with  $10^8$  pfu of MVA-CMDR expressing the Env gp150 protein from a clade E virus (isolate CM235) together with Gag and inactivated Pol from a clade A virus (isolate CM240). Placebo volunteers were primed and boosted with saline at the same timepoints. A total of 105 volunteers participated in the whole trial, with 30 in each Env vaccination group and 15 in the placebo group. Twenty of these volunteers provided leukapheresis samples after vaccination as a source of monocytes for the library experiments in this ancillary study.

At the time of experimentation, all those involved in this study, including the volunteers, the clinical staff, and the authors, were blinded with respect to sample identity. Samples were therefore evaluated for CD4<sup>+</sup> T cell responses to overlapping ConS peptides, which provided the best overall match across all vaccines. The study was

unblinded on completion of the full protocol, at which time it was revealed that eight volunteers had received ConS DNA, four had received NatB DNA, four had received Mosaic DNA, and four were placebo controls. The vaccination regimens are shown in **Table S1**.

The trial was conducted by the HIV Vaccine Trials Network (HVTN). The IND sponsor was the Division of AIDS (DAIDS), National Institutes of Health (NIH), Department of Health and Human Services (DHHS). The vaccines were provided by DAIDS (DNA) and the Military HIV Research Program (MHRP) at the Walter Reed Army Institute of Research (MVA).

### **Human samples**

Venous blood samples were collected from volunteers at the HVTN clinical sites. Leukapheresis samples were collected at two of these sites (Boston and Seattle). PBMCs were isolated via standard density gradient centrifugation as described previously (2). Peripheral blood samples for the generation of allogeneic feeder cells were processed similarly from leukapheresis cones purchased from National Health Service (NHS) Blood and Transplant UK. Allogeneic feeder cells were irradiated at 45 Gy.

### **T cell libraries**

PBMCs cryopreserved from pre-vaccination samples (V2) were thawed and enriched for CD4<sup>+</sup> T cells using a MicroBead Kit (Miltenyi Biotec). CD14<sup>+</sup> monocytes were prepared similarly from leukapheresis samples using a MicroBead Kit (Miltenyi Biotec) and cryopreserved in liquid nitrogen for use in downstream assays with autologous

CD4<sup>+</sup> T cells. CD4<sup>+</sup> T cells were stained for 15 min at room temperature with LIVE/DEAD Fixable Aqua (Thermo Fisher Scientific), anti-CD3–APC-Cy7 (clone SK7; 561800 BD Biosciences), anti-CD4–APC (clone SK3; 566915 BD Biosciences), anti-CD45RA–PacBlue (clone MEM56; MHCD45RA28 Thermo Fisher Scientific), anti-CCR7–FITC (clone 3D12; 11-1979-42 Thermo Fisher Scientific), and the dump markers anti-CD8–PE-Cy7 (clone SK1; 335787 BD Biosciences), anti-CD14–PE-Cy7 (clone M5E2; 557742 BD Biosciences), anti-CD16–PE-Cy7 (clone 3G8; 557744 BD Biosciences), anti-CD19–PE-Cy7 (clone SJ25C1; 557835 BD Biosciences), and anti-CD56–PE-Cy7 (clone B159; 557747 BD Biosciences). Live dump<sup>-</sup> CD3<sup>+</sup> CD4<sup>+</sup> T cells were sorted into naïve (CD45RA<sup>+</sup> CCR7<sup>+</sup>) and memory (CD45RA<sup>-</sup> CCR7<sup>-/+</sup>) populations ( $0.5 \times 10^5$  to  $2 \times 10^6$  per subset) at a minimum purity of 98% using a FACSAria III (BD Biosciences).

FACS-sorted naïve and memory CD4<sup>+</sup> T cells were seeded at a limiting dilution of  $3 \times 10^4$  cells/mL into RAB5, which comprised RPMI 1640 glutamine [-] medium supplemented with 1% non-essential amino acids, 1% sodium pyruvate, 1% glutamine, 0.1%  $\beta$ -mercaptoethanol, and 1% penicillin/streptomycin (all from Thermo Fisher Scientific), 5% pooled human AB sera (UK National Blood Service), and 500 U/mL IL-2 (University of Oxford). Cells were expanded with 1  $\mu$ g/mL PHA (Remel) in the presence of irradiated allogeneic feeder cells from four different healthy donors ( $0.5 \times 10^6$  feeder cells/mL). After 20 days, an aliquot of each line was screened for the capacity to proliferate in response to ConS. Overlapping peptides spanning the entire protein were split into two pools (pool 1 and pool 2) to avoid DMSO toxicity issues (**Table S2**). Autologous CD14<sup>+</sup> monocytes were thawed, irradiated at 45 Gy, and incubated at  $3 \times 10^5$  cells/mL with pool 1 or pool 2 peptides (2  $\mu$ g/mL) for 5 hours.

Negative control wells incorporated medium supplemented with 0.045% DMSO (Sigma-Aldrich), and positive control wells incorporated medium supplemented with 10 µg/mL PHA (Remel) and 100 U/mL IL-2 (University of Oxford). An aliquot of  $2.5 \times 10^6$  cells/mL from each CD4<sup>+</sup> T cell line was added to the monocytes after washing and resting in fresh culture medium without IL-2 for 4 hours. After 3 days, 1 µCi/mL [<sup>3</sup>H]-thymidine was added to the cultures, and proliferation was measured after a further 18 hours using a MicroBeta2 Counter (Perkin Elmer) (3-6).

Positive responses were defined as >3,000 cpm with a stimulation index >5 after background subtraction (cpm in the negative control wells), informed by previous studies of assay reproducibility (3, 4). These cell lines were cryopreserved for further analysis. Proliferative responses were confirmed in epitope mapping experiments. The precursor frequency of responding cells per million was calculated according to the Poisson distribution (3-6). The 95% confidence intervals were determined according to the modified Wald method (7).

To confirm unbiased clonal expansion, live naïve-enriched (CD45RA<sup>+</sup>) and memory-enriched (CD45RA<sup>-</sup>) CD4<sup>+</sup> T cells were FACS-sorted as above using a FACSAria III (BD Biosciences). Cells were then stained using a TCR Vβ Repertoire Kit (IOtest Beta Mark, PMIM3497 Beckman Coulter). The expression of different TCR Vβ families determined by flow cytometry was compared on day 0 before expansion and on day 27 after expansion as described above.

## Peptide pools and mapping

ConS peptides were synthesized as 15mers overlapping by 11 amino acids (total n = 212; GenScript). Peptides were split equally into two pools (pool 1 and pool 2) and used at a final concentration of 2  $\mu\text{g}/\text{mL}$  (**Table S2**). Individual peptides recognized by T cell lines from the pre-immunization timepoint were mapped using a matrix designed from pool 1 or pool 2 as appropriate. Matrices comprised 18 pools with 18 peptides per pool and a coverage of 3 as described previously (8). Each positive cell line was stimulated as described above and assayed for IFN- $\gamma$  production via ELISpot.

Env-specific responses in PBMCs from V7 and V15 were mapped using ex vivo IFN- $\gamma$  ELISpot assays employing a matrix comprising 60 pools with 18 peptides per pool and a coverage of 5 spanning all 212 peptides. Pool 1 and pool 2 peptides were used separately in cultured IFN- $\gamma$  ELISpot assays from the same timepoints. Specific responses identified after matrix deconvolution were confirmed in further IFN- $\gamma$  ELISpot assays with single peptides.

## ELISpot assay

ELISpot plates (Millipore) were coated with anti-IFN- $\gamma$  (clone 1-D1K; 1  $\mu\text{g}/\text{mL}$ ; 3420-2A Mabtech) and blocked with R10, which comprised RPMI 1640 glutamine [-] medium supplemented with 1% non-essential amino acids, 1% sodium pyruvate, 1% glutamine, 0.1%  $\beta$ -mercaptoethanol, and 1% penicillin/streptomycin (all from Thermo Fisher Scientific), and 10% fetal bovine serum (Gibco). PBMCs ( $2 \times 10^5$  cells/well) or T cell lines ( $4 \times 10^4$  cells/well) were added to the blocked plates and incubated with peptides (2  $\mu\text{g}/\text{mL}$ ) for 18–24 hours at 37°C. After incubation, the plates were washed

eight times in Dulbecco's phosphate buffered saline supplemented with 0.05% Tween (PBS-Tween; Sigma-Aldrich) and incubated for 2–4 hours at room temperature with biotinylated anti-IFN- $\gamma$  (clone 7-B6-1; 1  $\mu\text{g}/\text{mL}$ ; 3420-2A Mabtech) diluted in PBS containing 0.5% bovine serum albumin (Sigma-Aldrich). The plates were then washed eight times in PBS-Tween, incubated with biotin-avidin peroxidase (Vector Laboratories) for 1 hour at room temperature, washed four times in PBS-Tween and four times in PBS, and developed for 20 minutes with AEC Substrate Solution or ImmPACT AMEC Red Peroxidase Substrate Solution (both from Vector Laboratories). Spots were counted using an automated ELISpot Reader System (Autoimmun Diagnostika GmbH).

Each assay was repeated by a different operator using separate aliquots of cryopreserved PBMCs. Independent confirmation was important in this context, because DNA typically elicits only weak primary immune responses in humans (9). Positive responses were defined as  $>20$  SFU/ $10^6$  cells in ex vivo assays and  $>50$  SFU/ $10^6$  cells in cultured assays after background subtraction.

### **Short-term cell lines**

PBMCs cryopreserved from V7 and V15 were thawed and cultured for 10 days at  $1.5 \times 10^6$  cells/mL in RAB10 (as for RAB5 with 10% pooled human AB sera) supplemented with pool 1 or pool 2 peptides (2  $\mu\text{g}/\text{mL}$ ) and 25 ng/mL IL-7 (R&D Systems). Cultures were supplemented on days 3 and 7 with 1,800 U/mL IL-2 (University of Oxford) in fresh RAB10. After 10 days, cells were washed three times and rested for 30 hours in RAB10.

### **Peptide-specific CD4<sup>+</sup> T cell clones**

Reactive lines from the T cell library were thawed and rested for 2–3 hours in RAB5. Autologous CD14<sup>+</sup> monocytes were thawed, irradiated at 45 Gy, and incubated at  $3 \times 10^6$  cells/mL with the relevant peptides (2  $\mu$ g/mL) for 3 hours. Rested CD4<sup>+</sup> T cells were added to the pulsed monocytes at a 3:1 ratio. Negative controls incorporated medium supplemented with 0.045% DMSO (Sigma-Aldrich). After 7 days, cells were stained for 15 minutes at 37°C with LIVE/DEAD Fixable Aqua (Thermo Fisher Scientific), anti-CD3–PE–Texas Red (clone 7D6; MHCD0317 Invitrogen), anti-CD4–APC–Cy7 (clone RPA-T4; 557871 BD Biosciences), anti-CD25–PE–Cy7 (clone 2A3; 335824 BD Biosciences), anti-ICOS–PE (clone C398.4A; 313508 BioLegend), and the dump marker anti-CD14–FITC (clone M5E2; 561712 BD Biosciences). Activated live T cells (CD14<sup>-</sup> CD3<sup>+</sup> CD4<sup>+</sup> CD25<sup>+</sup> ICOS<sup>+</sup>) were sorted using a FACS Aria III (BD Biosciences) and seeded at 0.4 cells/well into 384-well plates (Corning). Cells were expanded with 1  $\mu$ g/mL PHA (Remel) in the presence of irradiated allogeneic feeder cells from three different healthy donors ( $0.5 \times 10^6$  feeder cells/mL) in RAB5 supplemented with 500 U/mL IL-2 (University of Oxford). After 12–14 days, T cell clones were identified and transferred into 96-well round-bottom plates (Corning). An aliquot from each clone ( $5 \times 10^4$  cells/mL) was stimulated with the relevant peptide (2  $\mu$ g/mL) after washing and resting in fresh RAB5 without IL-2 for 5 hours. IFN- $\gamma$  production was measured via ELISpot. Positive clones were defined as  $>50$  SFU/ $10^6$  cells after background subtraction.

### **TCR sequencing**

Peptide-specific CD4<sup>+</sup> T cell clones were stained as described above for viability and surface expression of CD3 and CD4. A maximum of  $5 \times 10^3$  live CD3<sup>+</sup> CD4<sup>+</sup> T cells

was sorted into 100  $\mu$ L of RNAlater (Ambion) using a FACSAria III (BD Biosciences). All expressed *TRA* and *TRB* gene transcripts were amplified using an unbiased template-switch anchored RT-PCR (10). Amplicons were sub-cloned, sampled, and sequenced as described previously (11). Gene use was assigned using the ImMunoGeneTics (IMGT) nomenclature (12).



## SUPPLEMENTAL FIGURES AND FIGURE LEGENDS

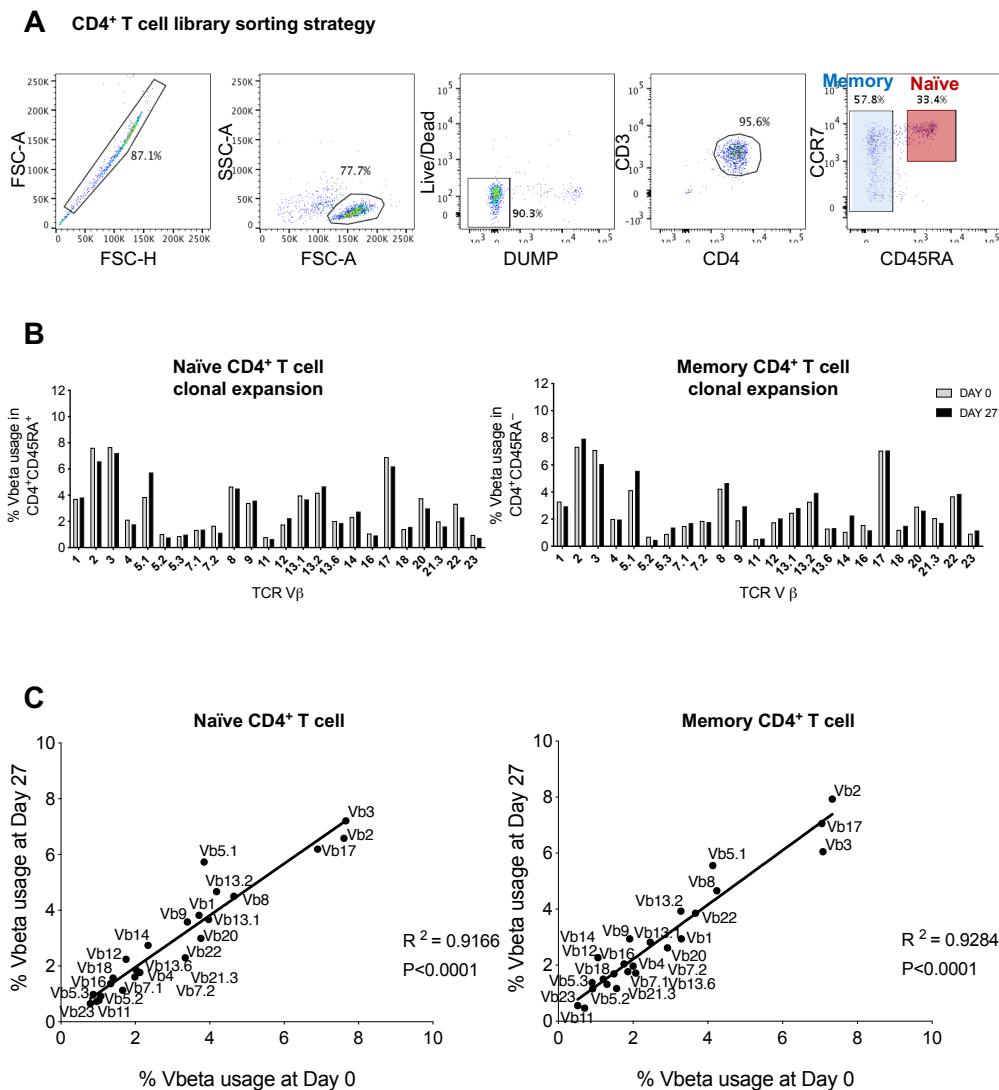

**Figure S1. Isolation and expansion of pre-immunization naïve and memory CD4<sup>+</sup> T cells.** (A) Flow cytometric gating strategy for the purification of naïve and memory CD4<sup>+</sup> T cells. Cells were gated serially as singlets, lymphocytes, and Aqua<sup>-</sup> CD8<sup>-</sup> CD14<sup>-</sup> CD16<sup>-</sup> CD19<sup>-</sup> CD56<sup>-</sup> events, and then as naïve (CD45RA<sup>+</sup> CCR7<sup>+</sup>) or memory (CD45RA<sup>-</sup> CCR7<sup>-/+</sup>) CD3<sup>+</sup> CD4<sup>+</sup> T cells. (B) Naïve and memory CD4<sup>+</sup> T cells were tested for protein-level expression of the indicated TCR Vβ segments before (day 0) and after expansion (day 27). Data are shown from one representative donor. (C) Correlations between percent expression of each TCR Vβ segment at day 0 and day 27. Significance was assessed using the Spearman rank test.

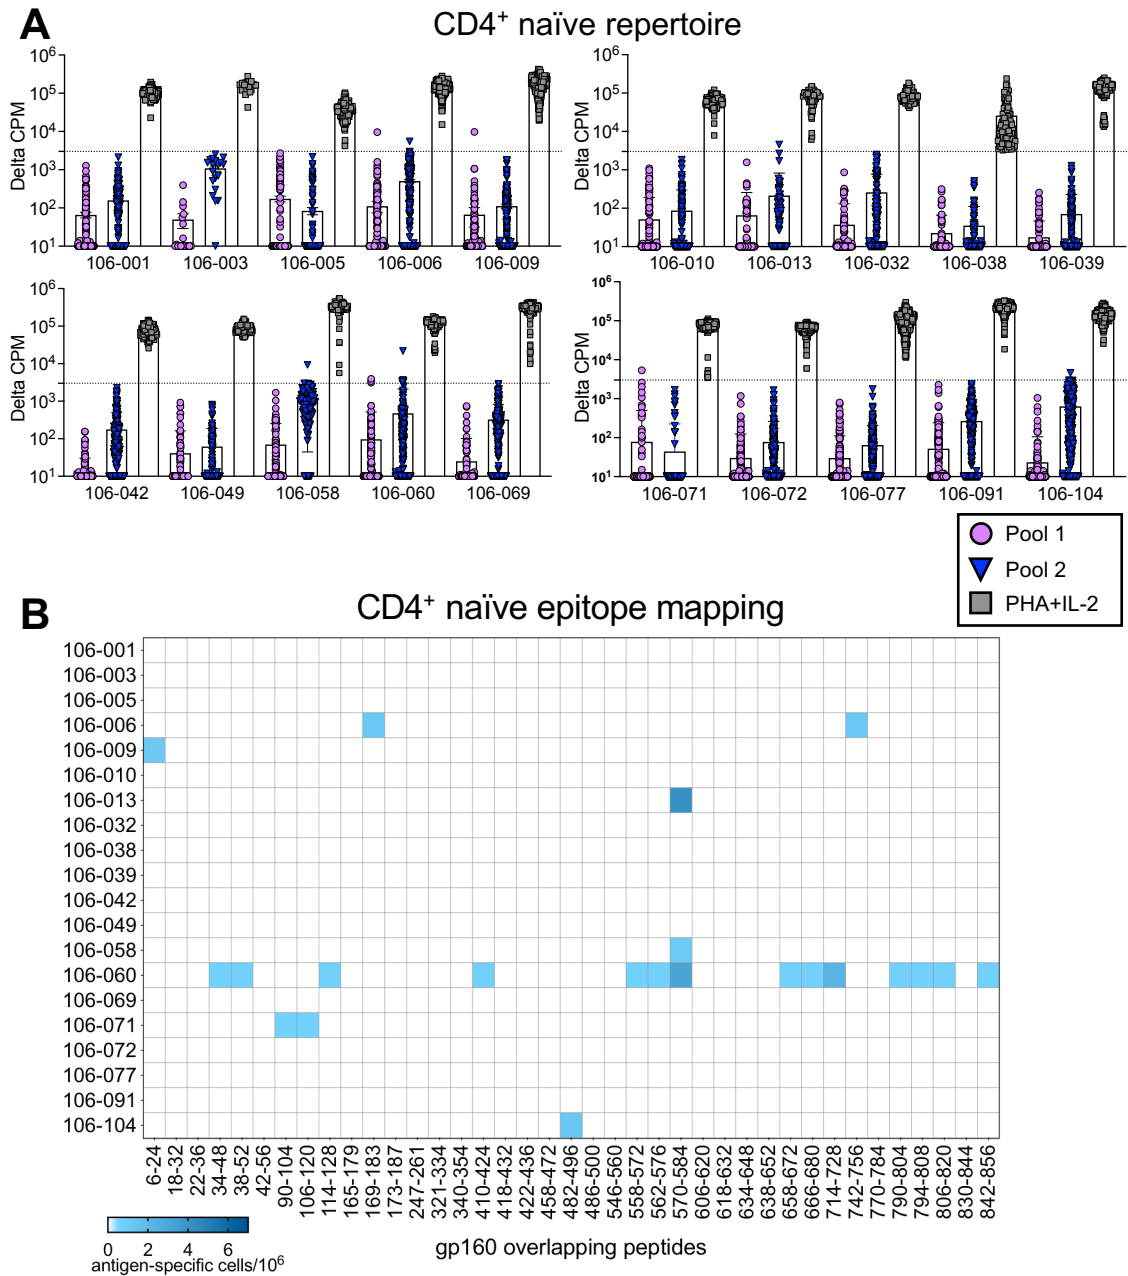

**Figure S2. The pre-immunization repertoire and epitope specificity of Env-specific naïve CD4<sup>+</sup> T cells.** Pre-immunization repertoires of 20 donors were screened for Env reactivity using the T cell library method with two pools of overlapping peptides collectively spanning the entire consensus sequence protein (ConS). Positive control wells included phytohemagglutinin (PHA) and IL-2. Proliferative responses are shown for naïve (**A**) before vaccination (V2). Data are shown after background subtraction (mean  $\pm$  SD). Positive responses were defined as  $>3,000$  cpm with a stimulation index  $>5$  (dotted line). Env-reactive CD4<sup>+</sup> T cell lines derived from the pre-immunization naïve were mapped for epitope specificity and the precursor frequency was calculated (**B**).

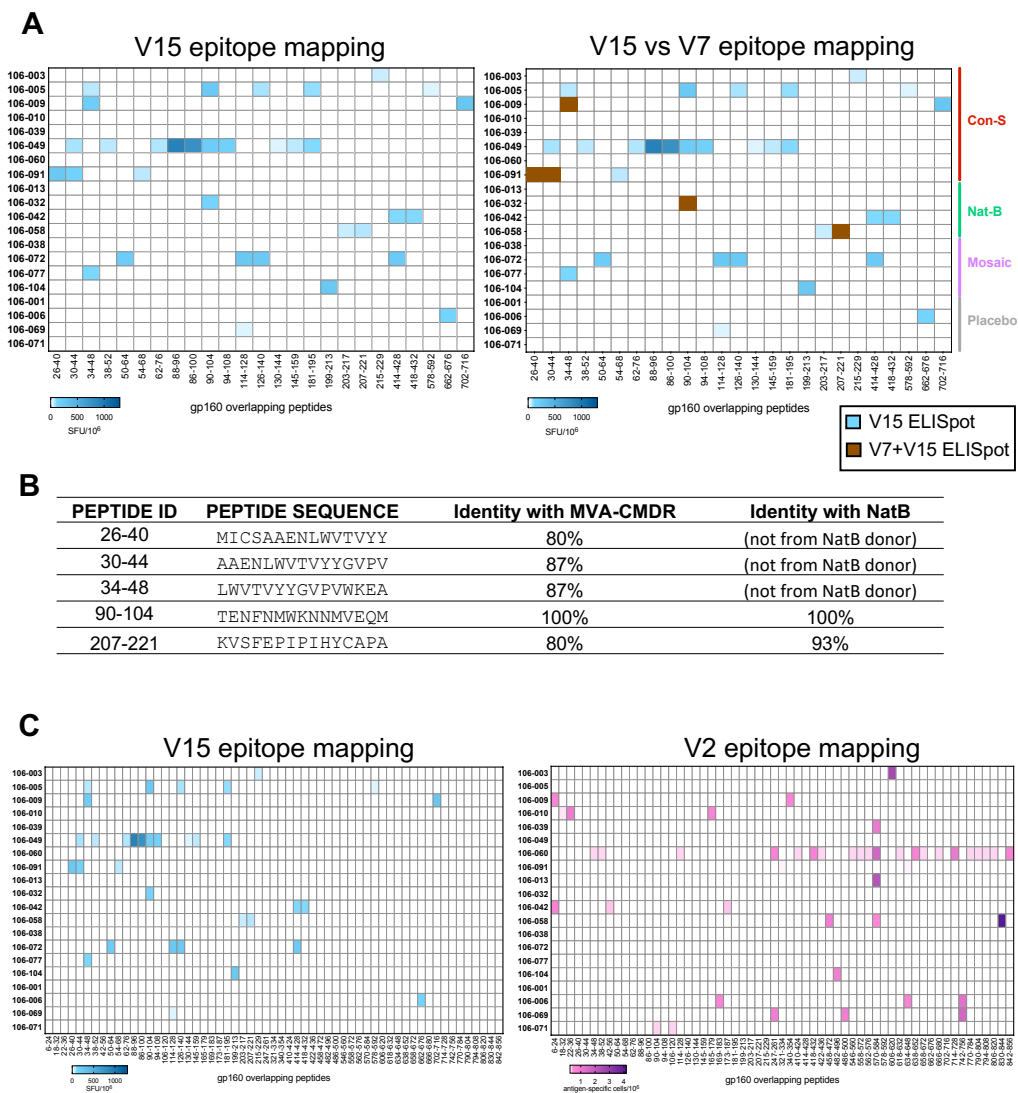

**Figure S3. Epitope specificity of Env-reactive CD4<sup>+</sup> T cells after boosting with MVA-CMDR.** Post-vaccination CD4<sup>+</sup> T cell responses were mapped and quantified at V15 using ex vivo and cultured IFN- $\gamma$  ELISpot assays. **(A)** Heatmaps showing the combined epitope mapping data from all volunteers at V15 (left) alongside a comparison with the epitope mapping data from all volunteers at V7 (right). Ex vivo results are shown if both ex vivo and cultured data were available. **(B)** Sequence similarity (% identity of amino acids, determined by alignment of peptide sequences with the MVA-CMDR Env gp-150 sequence) between the five peptides from ConS-Env identified in both V7 and V15 and the MVA-CMDR sequence. Peptides from ConS-Env identified in NatB donors have also been aligned to the NatB Env sequence. **(C)** Heatmaps showing a comparison between response magnitudes from all volunteers at V15 (left) and precursor frequencies from all volunteers at V2 (right). Data are shown as mean values. SFU, spot-forming unit.

| Whole sequence comparison |  | Overall Identity % |
|---------------------------|--|--------------------|
| ConS vs NatB              |  | 80%                |
| ConS vs Mosaic1           |  | 85%                |
| ConS vs Mosaic2           |  | 84%                |
| ConS vs Mosaic3           |  | 82%                |
| ConS vs MVA-CMDR          |  | 80%                |
| NatB vs MVA-CMDR          |  | 74%                |
| Mosaic1 vs MVA-CMDR       |  | 75%                |
| Mosaic2 vs MVA-CMDR       |  | 77%                |
| Mosaic3 vs MVA-CMDR       |  | 75%                |

  

| PEPTIDE ID | PEPTIDE SEQUENCE | Single Identity with MVA-CMDR |
|------------|------------------|-------------------------------|
| 6-24       | NCQHLLWRWGTLILGM | 75%                           |
| 18-32      | GTLLGLMLMICSAAE  | 67%                           |
| 22-36      | LGMLMICSAAENLWV  | 67%                           |
| 34-48      | LWVTYYGVPVWKEA   | 87%                           |
| 38-52      | VYYGVPVWKEANTTL  | 80%                           |
| 42-56      | VPVWKEANTTLFCAS  | 80%                           |
| 90-104     | TENFNMMKNNMVEQM  | 100%                          |
| 106-120    | EDIISLWDQSLKPCV  | 93%                           |
| 114-128    | QSLKPCVKLTPLCVT  | 100%                          |
| 165-179    | IRDKKQKVYALFYRL  | 80%                           |
| 169-183    | KQKVYALFYRLDVVP  | 80%                           |
| 173-187    | YALFYRLDVVPIDDD  | 73%                           |
| 247-261    | CTHGKPPVSTQLLL   | 100%                          |
| 321-334    | GDIIGDIRQAHCNIS  | 73%                           |
| 340-354    | KTLQQVAKKLEHFN   | 60%                           |
| 410-424    | TITLPCRIKQIINMW  | 87%                           |
| 418-432    | CRKQIINMWQGVGO   | 87%                           |
| 422-436    | QIINMWQGVGOAMYA  | 93%                           |
| 458-472    | GNNNTNETIFRPGG   | 77%                           |
| 482-496    | ELYKYKVVVKIEPLGV | 87%                           |
| 486-500    | YKVVKIEPLGVAPTK  | 80%                           |
| 546-560    | SGIVQQSNLLRAIE   | 100%                          |
| 558-572    | AIEAQQHLLQLTVWG  | 100%                          |
| 562-576    | QQHLLQLTVWGIKQL  | 100%                          |
| 570-584    | VWGIKQLQARVLAVE  | 100%                          |
| 606-620    | TTVPWNSSWSNKSQD  | 67%                           |
| 618-632    | SQDEIWDNMTWMEWE  | 73%                           |
| 634-648    | EINNYTDIIYSLIEE  | 53%                           |
| 638-652    | YTDIIYSLIEESQNO  | 60%                           |
| 658-672    | QELLALDKWASLWNW  | 80%                           |
| 666-680    | WASLWNWFDITNWLW  | 93%                           |
| 714-728    | PLSFQTLIPNPRGPD  | 60%                           |
| 742-756    | RDRSIRLVNGFLALA  | not found                     |
| 770-784    | RLRDFILIAARTVEL  | not found                     |
| 790-804    | WEALKYLWNLQYWG   | not found                     |
| 794-808    | KYLWNLQYWGQELK   | not found                     |
| 806-820    | ELKNSAISLLDTTAI  | not found                     |
| 830-844    | IEVVQRACRAILNIP  | not found                     |
| 842-856    | NIPRRIRQGLERALL  | not found                     |

**Figure S4. Sequence comparison with MVA-CMDR.**

(A) Sequence similarities (expressed as % identity in amino acids, determined from sequence alignments) between the antigens used in different arms of the study (ConS, NatB and trivalent Mosaic) and MVA-CMDR. (B) Sequence matching with MVA-CMDR (% identity of amino acids, determined by alignment of peptides sequences with the MVA-CMDR Env gp150 sequence) of the individual ConS peptides found to be recognised at the pre-vaccination time point.

**A****Donor 106-009**

Clone specific for peptide 340-354: KTLQQVAKKLRHFN

| CELL LINE  | CLONE ID | TRAV | TRAV CDR3    | TRAJ | TRBV | TRBV CDR3        | TRBJ |
|------------|----------|------|--------------|------|------|------------------|------|
| memory#180 | 66       | 22   | CAVWSGYSTLTF | 11   | 20-1 | CSAREVGKSSYNSPLH | 1-6  |
| memory#180 | 23       | 22   | CAVWSGYSTLTF | 11   | 20-1 | CSAREVGKSSYNSPLH | 1-6  |

**Donor 106-039**

Clone specific for peptide 570-584: VWGIKQLQARVLAVE

| CELL LINE | CLONE ID | TRAV   | TRAV CDR3      | TRAJ | TRBV | TRBV CDR3       | TRBJ |
|-----------|----------|--------|----------------|------|------|-----------------|------|
| memory#55 | 3        | 21     | CAVSNINAGKST   | 27   | 5-1  | CASSWGTGAPGGELF | 2-2  |
| memory#55 | 3        | 23/DV6 | CAALETGNYGQNFV | 26   | 5-1  | CASSWGTGAPGGELF | 2-2  |
| memory#55 | 7        | 21     | CAVSNINAGKST   | 27   | 5-1  | CASSWGTGAPGGELF | 2-2  |
| memory#55 | 7        | 23/DV6 | CAALETGNYGQNFV | 26   | 5-1  | CASSWGTGAPGGELF | 2-2  |
| memory#62 | 25       | n.d.   | n.d.           | n.d. | 12-3 | CASSSAGGTYEQY   | 2-7  |
| memory#99 | 2        | n.d.   | n.d.           | n.d. | 12-3 | CASSSAGGTYEQY   | 2-7  |
| memory#99 | 3        | n.d.   | n.d.           | n.d. | 19   | CASSLAFNQPH     | 1-5  |

**B**

| DONOR ID | PEPTIDE-ENRICHMENT | TRBV | TRBV CDR3          | TRBJ | Freq (%) |
|----------|--------------------|------|--------------------|------|----------|
| 106-009  | 340-354            | 5-6  | CASSSGQDRFLWY      | 2-7  | 27.78    |
| 106-009  | 340-354            | 7-2  | CAESGRSNTGELF      | 2-2  | 19.44    |
| 106-009  | 340-354            | 3-1  | CASSQEVLNNSAFTGELF | 2-2  | 8.33     |
| 106-009  | 340-354            | 20-1 | CSASSPSGRKSSYNEQF  | 2-1  | 8.33     |
| 106-009  | 340-354            | 7-2  | CASSSSGTLQETQY     | 2-5  | 8.33     |
| 106-009  | 340-354            | 9    | CASSVGAGTSPLH      | 1-6  | 5.56     |
| 106-009  | 340-354            | 20-1 | CSARDPQGDTOY       | 2-3  | 5.56     |
| 106-009  | 340-354            | 20-1 | CSAREVGKSSYNSPLH   | 1-6  | 2.78     |
| 106-009  | 340-354            | 5-1  | CASSRGRGQGANKEKLF  | 1-4  | 2.78     |
| 106-009  | 340-354            | 18   | CASSPLSRVNNQPH     | 1-5  | 2.78     |
| 106-009  | 340-354            | 11-3 | CASSLGETYEQY       | 2-7  | 2.78     |
| 106-009  | 340-354            | 5-6  | CASSLVDNTEAF       | 1-1  | 2.78     |
| 106-009  | 340-354            | 20-1 | CSATYNEQF          | 2-1  | 2.78     |
| 106-039  | 570-584            | 7-2  | CASSFTGTGNQETQY    | 2-5  | 62.79    |
| 106-039  | 570-584            | 12-4 | CASRTGTSGRYEQF     | 2-1  | 6.98     |
| 106-039  | 570-584            | 27   | CASSHQGRDGYT       | 1-2  | 4.65     |
| 106-039  | 570-584            | 20-1 | CSARRTACTEAF       | 1-1  | 4.65     |
| 106-039  | 570-584            | 20-1 | CSAGQVNYGYT        | 1-2  | 4.65     |
| 106-039  | 570-584            | 4-2  | CASSQVWAVSTNNEQF   | 2-1  | 2.33     |
| 106-039  | 570-584            | 16   | CASSPRTGLDYGTY     | 1-2  | 2.33     |
| 106-039  | 570-584            | 12-4 | CASSRIGQGNNEQF     | 2-1  | 2.33     |
| 106-039  | 570-584            | 5-1  | CASSLANQPGDQY      | 2-3  | 2.33     |
| 106-039  | 570-584            | 27   | CASSRTIESYEQF      | 2-1  | 2.33     |
| 106-039  | 570-584            | 19   | CASSIAGNQPH        | 1-5  | 2.33     |
| 106-039  | 570-584            | 19   | CASSIAPDDGYT       | 1-2  | 2.33     |

**C**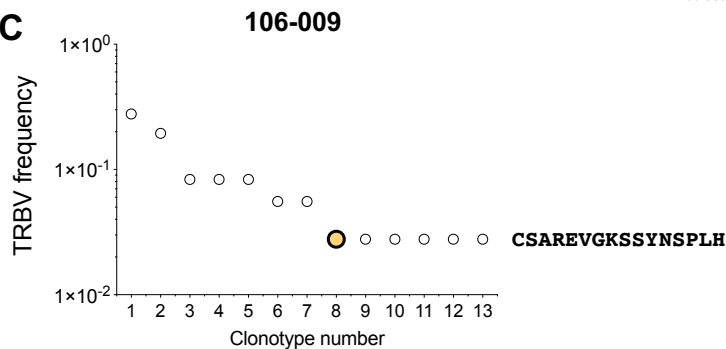

**Figure S5. Clonotype representation in the pre- and post-vaccination repertoire of Env-reactive CD4<sup>+</sup> T cells. (A)** CD4<sup>+</sup> T cell clones were derived from the pre-immunization repertoires (V2) of two volunteers, 106-009 and 106-039, who showed matching post-vaccination responses to ConS peptides (V7). Expressed *TRA* and *TRB* gene rearrangements were sequenced from mRNA. Cryopreserved PBMCs from V7 were cultured with the relevant Env peptides to expand the corresponding epitope-specific CD4<sup>+</sup> T cells. After 10 days, memory CD4<sup>+</sup> T cells were FACS-sorted to purity, and constituent clonotypes were identified by sequencing all expressed *TRB* gene rearrangements from mRNA. **(B)** Clonotype frequencies in donors 106-009 and 106-039. The highlighted sequence was found in the pre-immunization repertoire of donor 106-009. **(C)** Graphical representation of the data shown in A for donor 106-009.

### Vaccination schedule

| TIME COURSE                                        |   |               |    |               |    |               |    |             |     |             |     |     |     |     |     |
|----------------------------------------------------|---|---------------|----|---------------|----|---------------|----|-------------|-----|-------------|-----|-----|-----|-----|-----|
| VISIT                                              | 1 | 2             | 3  | 4             | 5  | 6             | 7  | 8           | 9   | 10          | 11  | 12  | 13  | 14  | 15  |
| DAY                                                |   | 0             | 14 | 28            | 42 | 56            | 70 | 112         | 126 | 224         | 231 | 238 | 334 | 417 | 425 |
| WEEK                                               |   | 0             | 2  | 4             | 6  | 8             | 10 | 16          | 18  | 32          | 33  | 34  | 44  | 55  | 56  |
| ARM                                                |   |               |    |               |    |               |    |             |     |             |     |     |     |     |     |
| Nat-B<br>013*, 032, 042, 058                       |   | DNA<br>NatB   |    | DNA<br>NatB   |    | DNA<br>NatB   |    | MVA<br>CMDR |     | MVA<br>CMDR |     |     |     |     |     |
| Con-S<br>003, 005, 009, 010,<br>039, 049, 060, 091 |   | DNA<br>ConS   |    | DNA<br>ConS   |    | DNA<br>ConS   |    | MVA<br>CMDR |     | MVA<br>CMDR |     |     |     |     |     |
| Mosaic<br>038, 072, 077, 104                       |   | DNA<br>Mosaic |    | DNA<br>Mosaic |    | DNA<br>Mosaic |    | MVA<br>CMDR |     | MVA<br>CMDR |     |     |     |     |     |
| Placebo<br>001, 006, 069, 071                      |   | saline        |    | saline        |    | saline        |    | saline      |     | saline      |     |     |     |     |     |

↓
↓
↓

Blood draw
Blood draw
Blood draw

\*volunteers are depicted in an anonymized format by abbreviated publication-IP, lacking the 106 prefix.

**Table S1. Schematic representation of the vaccination schedule.**

| PEPTIDE ID | SEQUENCE          | PEPTIDE POOL | DESCRIPTION   | POLYPROTEIN |
|------------|-------------------|--------------|---------------|-------------|
| 1-16       | MVRVGRQIRNCGHWR   | POOL 1       | HVTN106 Con S | gp160       |
| 2-20       | GIQRNCQQLWRWGL    | POOL 1       | HVTN106 Con S | gp160       |
| 6-24       | NCQLWRWRCVGLGH    | POOL 1       | HVTN106 Con S | gp160       |
| 14-28      | LRRWGLILGLMIAE    | POOL 1       | HVTN106 Con S | gp160       |
| 18-32      | GLLLGLMLICSAAE    | POOL 1       | HVTN106 Con S | gp160       |
| 22-36      | LGLMLICSAARENLY   | POOL 1       | HVTN106 Con S | gp160       |
| 26-40      | NICSAENLWVTVY     | POOL 1       | HVTN106 Con S | gp160       |
| 30-44      | AAENLWVTVYGVV     | POOL 1       | HVTN106 Con S | gp160       |
| 34-48      | LWVTVYGVVWKEA     | POOL 1       | HVTN106 Con S | gp160       |
| 38-52      | VYGVVWKEANTLL     | POOL 1       | HVTN106 Con S | gp160       |
| 42-56      | VFWKEANTLLFCAS    | POOL 1       | HVTN106 Con S | gp160       |
| 46-60      | KEANTLLFCASAKA    | POOL 1       | HVTN106 Con S | gp160       |
| 50-64      | TLFCASAKAYDTE     | POOL 1       | HVTN106 Con S | gp160       |
| 54-68      | CASAKAYDTEVHN     | POOL 1       | HVTN106 Con S | gp160       |
| 58-72      | AKAYDTEVHNWATH    | POOL 1       | HVTN106 Con S | gp160       |
| 62-76      | DETVHNWATHACVP    | POOL 1       | HVTN106 Con S | gp160       |
| 66-80      | HNWATHACVPTDPM    | POOL 1       | HVTN106 Con S | gp160       |
| 70-84      | ATHACVPTDPMQEI    | POOL 1       | HVTN106 Con S | gp160       |
| 74-88      | CVPTDPMQEIIVLEN   | POOL 1       | HVTN106 Con S | gp160       |
| 78-92      | DPMPQEIIVLENTEN   | POOL 1       | HVTN106 Con S | gp160       |
| 82-90      | QEIIVLENT         | POOL 1       | HVTN106 Con S | gp160       |
| 88-96      | NVTENPMNW         | POOL 1       | HVTN106 Con S | gp160       |
| 86-100     | LENVTENPMNKNM     | POOL 1       | HVTN106 Con S | gp160       |
| 90-104     | TENPMNKNMVEQM     | POOL 1       | HVTN106 Con S | gp160       |
| 94-108     | MWKNMVEQMHEDI     | POOL 1       | HVTN106 Con S | gp160       |
| 102-116    | MWVEQMHEDIISLW    | POOL 1       | HVTN106 Con S | gp160       |
| 106-120    | EDIISLWQSLKPCV    | POOL 1       | HVTN106 Con S | gp160       |
| 110-124    | SLWQSLKPCVKLTP    | POOL 1       | HVTN106 Con S | gp160       |
| 114-128    | QSLKPCVKLTPLCVT   | POOL 1       | HVTN106 Con S | gp160       |
| 118-132    | PCVKLTPLCVTLACT   | POOL 1       | HVTN106 Con S | gp160       |
| 122-136    | LTPCLVTLACTNVTN   | POOL 1       | HVTN106 Con S | gp160       |
| 126-140    | CVTLACTNVTNTNT    | POOL 1       | HVTN106 Con S | gp160       |
| 130-144    | NCTNVTNTNTNTE     | POOL 1       | HVTN106 Con S | gp160       |
| 140-154    | VNTNTNTNTEEKG     | POOL 1       | HVTN106 Con S | gp160       |
| 144-158    | NTEEKGIEKRCNC     | POOL 1       | HVTN106 Con S | gp160       |
| 148-162    | TNTEEKGIEKRCNCF   | POOL 1       | HVTN106 Con S | gp160       |
| 149-163    | EKRCNCFEIKNSFIT   | POOL 1       | HVTN106 Con S | gp160       |
| 153-167    | EIKNSFITETPRD     | POOL 1       | HVTN106 Con S | gp160       |
| 157-171    | CSFITETPRDKKQK    | POOL 1       | HVTN106 Con S | gp160       |
| 161-175    | ITETPRDKKQKVAL    | POOL 1       | HVTN106 Con S | gp160       |
| 165-179    | IRDKKQKVALFYRL    | POOL 1       | HVTN106 Con S | gp160       |
| 169-183    | KQKVALFYRLDVP     | POOL 1       | HVTN106 Con S | gp160       |
| 173-187    | YALFYRLDVPIDDD    | POOL 1       | HVTN106 Con S | gp160       |
| 177-191    | YRLDVPIDDDNNNS    | POOL 1       | HVTN106 Con S | gp160       |
| 181-195    | VVPIDDDNNNSNYR    | POOL 1       | HVTN106 Con S | gp160       |
| 184-198    | DDNNNSNYRLINC     | POOL 1       | HVTN106 Con S | gp160       |
| 185-199    | NNSNYRLINCFYSA    | POOL 1       | HVTN106 Con S | gp160       |
| 188-202    | NYRLINCFYSAITQAC  | POOL 1       | HVTN106 Con S | gp160       |
| 191-205    | YRLINCFYSAITQAC   | POOL 1       | HVTN106 Con S | gp160       |
| 195-209    | NCYSAITQACPCKV    | POOL 1       | HVTN106 Con S | gp160       |
| 199-213    | SAITQACPCKVSEPI   | POOL 1       | HVTN106 Con S | gp160       |
| 203-217    | QACPCKVSEPIPIHY   | POOL 1       | HVTN106 Con S | gp160       |
| 207-221    | KVSEPIPIHYCAPA    | POOL 1       | HVTN106 Con S | gp160       |
| 211-225    | EPIPIHYCAPAGFAI   | POOL 1       | HVTN106 Con S | gp160       |
| 215-229    | IHYCAPAGFALIKCN   | POOL 1       | HVTN106 Con S | gp160       |
| 219-233    | APAGFALIKCNKPK    | POOL 1       | HVTN106 Con S | gp160       |
| 223-237    | FALIKCNKPKFGTG    | POOL 1       | HVTN106 Con S | gp160       |
| 227-241    | KCNKPKFGTGFCNK    | POOL 1       | HVTN106 Con S | gp160       |
| 231-245    | KPKFGTGFCNKVTV    | POOL 1       | HVTN106 Con S | gp160       |
| 235-249    | GTCFCNKVTVQCHT    | POOL 1       | HVTN106 Con S | gp160       |
| 239-253    | CKNVTVQCHTGLKPK   | POOL 1       | HVTN106 Con S | gp160       |
| 243-257    | STVQCHTGLKPVST    | POOL 1       | HVTN106 Con S | gp160       |
| 247-261    | CTHGLKPVSTQLLL    | POOL 1       | HVTN106 Con S | gp160       |
| 251-265    | IKPVSTQLLLNSGL    | POOL 1       | HVTN106 Con S | gp160       |
| 255-269    | VSTQLLLNSGLAEE    | POOL 1       | HVTN106 Con S | gp160       |
| 259-273    | LLNSGLAEEELIIR    | POOL 1       | HVTN106 Con S | gp160       |
| 263-277    | GLAEEELIIRSENI    | POOL 1       | HVTN106 Con S | gp160       |
| 267-281    | EELIIRSENIITNNA   | POOL 1       | HVTN106 Con S | gp160       |
| 271-285    | IIRSENIITNNAITII  | POOL 1       | HVTN106 Con S | gp160       |
| 275-289    | ENIITNNAITIIQNS   | POOL 1       | HVTN106 Con S | gp160       |
| 279-293    | NAITIIQNSVSEV     | POOL 1       | HVTN106 Con S | gp160       |
| 283-297    | TIQNSVSEVINCT     | POOL 1       | HVTN106 Con S | gp160       |
| 287-301    | QNSVSEVINCTRPN    | POOL 1       | HVTN106 Con S | gp160       |
| 291-305    | SEVINCTRPNNTKRR   | POOL 1       | HVTN106 Con S | gp160       |
| 295-309    | NCTRPNNTKRSIRI    | POOL 1       | HVTN106 Con S | gp160       |
| 299-313    | PNNTKRSIRIIPGQ    | POOL 1       | HVTN106 Con S | gp160       |
| 303-317    | TRKRSIRIIPGQAFYA  | POOL 1       | HVTN106 Con S | gp160       |
| 309-323    | IRIPGQAFYATGDI    | POOL 1       | HVTN106 Con S | gp160       |
| 313-327    | PQAFYATGDIIGDI    | POOL 1       | HVTN106 Con S | gp160       |
| 317-330    | FYATGDIIGDIRQAB   | POOL 1       | HVTN106 Con S | gp160       |
| 321-334    | GDIIGDIRQABRCNIS  | POOL 1       | HVTN106 Con S | gp160       |
| 324-338    | GDIRQABRCNISYRW   | POOL 1       | HVTN106 Con S | gp160       |
| 328-342    | QABRCNISYRWKNTL   | POOL 1       | HVTN106 Con S | gp160       |
| 332-346    | NISYRWKNTLQVQA    | POOL 1       | HVTN106 Con S | gp160       |
| 336-350    | TKWNTLQVQAKRLR    | POOL 1       | HVTN106 Con S | gp160       |
| 340-354    | KLQVQAKLREHFN     | POOL 1       | HVTN106 Con S | gp160       |
| 344-358    | QVAKLREHFNKTI     | POOL 1       | HVTN106 Con S | gp160       |
| 348-362    | KLREHFNKTIIFPK    | POOL 1       | HVTN106 Con S | gp160       |
| 352-366    | HFNKTIIFPKSSGG    | POOL 1       | HVTN106 Con S | gp160       |
| 357-371    | KTIIFPKSSGGDLI    | POOL 1       | HVTN106 Con S | gp160       |
| 361-375    | FKSSGGDLITTHS     | POOL 1       | HVTN106 Con S | gp160       |
| 365-379    | GGDLITTHSFCNCR    | POOL 1       | HVTN106 Con S | gp160       |
| 369-383    | LEITTHSFCNCRFF    | POOL 1       | HVTN106 Con S | gp160       |
| 373-387    | THSFCNCRFFYCNPT   | POOL 1       | HVTN106 Con S | gp160       |
| 377-391    | NCRFFYCNPTSGLP    | POOL 1       | HVTN106 Con S | gp160       |
| 381-395    | FFYCNPTSGLPNSTW   | POOL 1       | HVTN106 Con S | gp160       |
| 385-399    | CNPTSGLPNSTWIGN   | POOL 1       | HVTN106 Con S | gp160       |
| 389-404    | GLNSTWIGNGTGN     | POOL 1       | HVTN106 Con S | gp160       |
| 393-409    | STWIGNGTGNKNNNT   | POOL 1       | HVTN106 Con S | gp160       |
| 396-413    | GNGTGNKNNNTDIT    | POOL 1       | HVTN106 Con S | gp160       |
| 403-416    | KNNNTDITLPCRKQ    | POOL 1       | HVTN106 Con S | gp160       |
| 406-420    | NNTDITLPCRKQI     | POOL 1       | HVTN106 Con S | gp160       |
| 410-424    | ITLPCRKQIINMWO    | POOL 1       | HVTN106 Con S | gp160       |
| 414-428    | ITLPCRKQIINMWOQ   | POOL 1       | HVTN106 Con S | gp160       |
| 418-432    | CRITLPCRKQIINMWOQ | POOL 1       | HVTN106 Con S | gp160       |
| 422-436    | QIINMWOQVGMAY     | POOL 1       | HVTN106 Con S | gp160       |

| PEPTIDE ID | SEQUENCE          | PEPTIDE POOL | DESCRIPTION   | POLYPROTEIN |
|------------|-------------------|--------------|---------------|-------------|
| 426-440    | MWQVGMAYAPPPIE    | POOL 2       | HVTN106 Con S | gp160       |
| 430-444    | VGMAYAPPPIEKGIT   | POOL 2       | HVTN106 Con S | gp160       |
| 434-448    | MYAPPPIEKGITCKSN  | POOL 2       | HVTN106 Con S | gp160       |
| 438-452    | PIEKGITCKSNITGL   | POOL 2       | HVTN106 Con S | gp160       |
| 442-456    | KITCKSNITGLLFR    | POOL 2       | HVTN106 Con S | gp160       |
| 446-460    | KSNTGLLFRDGGN     | POOL 2       | HVTN106 Con S | gp160       |
| 450-464    | TGLLFRDGGNNNTN    | POOL 2       | HVTN106 Con S | gp160       |
| 454-468    | LFRDGGNNNTETEIP   | POOL 2       | HVTN106 Con S | gp160       |
| 458-472    | GNNNTETEIPFRGG    | POOL 2       | HVTN106 Con S | gp160       |
| 462-476    | TNETEIPFRGGDMR    | POOL 2       | HVTN106 Con S | gp160       |
| 466-480    | EIPFRGGDMRDNWR    | POOL 2       | HVTN106 Con S | gp160       |
| 470-484    | PGGDMRDNWRSELY    | POOL 2       | HVTN106 Con S | gp160       |
| 474-488    | DMRDNWRSELYKVK    | POOL 2       | HVTN106 Con S | gp160       |
| 478-492    | NWRSELYKVKVVKIE   | POOL 2       | HVTN106 Con S | gp160       |
| 482-496    | ELYKVKVVKIEPLGV   | POOL 2       | HVTN106 Con S | gp160       |
| 486-500    | YKVKVVKIEPLGVAPTK | POOL 2       | HVTN106 Con S | gp160       |
| 490-504    | KIEPLGVAPTKARRK   | POOL 2       | HVTN106 Con S | gp160       |
| 494-508    | LGVAPTKARRVVER    | POOL 2       | HVTN106 Con S | gp160       |
| 498-512    | PKARRVVEREKRA     | POOL 2       | HVTN106 Con S | gp160       |
| 502-516    | KRVVEREKRAVIG     | POOL 2       | HVTN106 Con S | gp160       |
| 506-520    | VEREKRAVIGAVPL    | POOL 2       | HVTN106 Con S | gp160       |
| 510-524    | KRAVIGAVPLGFLG    | POOL 2       | HVTN106 Con S | gp160       |
| 524-528    | GIGAVPLGFLGAAGS   | POOL 2       | HVTN106 Con S | gp160       |
| 518-532    | VFLGFLGAAGSTGMA   | POOL 2       | HVTN106 Con S | gp160       |
| 522-536    | FLGAAGSTGMAASIT   | POOL 2       | HVTN106 Con S | gp160       |
| 526-540    | AGSTGMAASITLTVQ   | POOL 2       | HVTN106 Con S | gp160       |
| 530-544    | MGAASITLTVQARQL   | POOL 2       | HVTN106 Con S | gp160       |
| 534-548    | SITLTVQARQLLSGI   | POOL 2       | HVTN106 Con S | gp160       |
| 538-552    | TVQARQLLSGIYVQQ   | POOL 2       | HVTN106 Con S | gp160       |
| 542-556    | QLLSGIYVQQSNLL    | POOL 2       | HVTN106 Con S | gp160       |
| 546-560    | SIGVYVQQSNLLRAIE  | POOL 2       | HVTN106 Con S | gp160       |
| 550-564    | QQSNLLRAIEAQQH    | POOL 2       | HVTN106 Con S | gp160       |
| 554-568    | NLLRAIEAQQHLLQL   | POOL 2       | HVTN106 Con S | gp160       |
| 558-572    | AIEAQQHLLQLTVWG   | POOL 2       | HVTN106 Con S | gp160       |
| 562-576    | QHQHLLQLTVWGIKQL  | POOL 2       | HVTN106 Con S | gp160       |
| 566-580    | LQLTVWGIKQLQARR   | POOL 2       | HVTN106 Con S | gp160       |
| 570-584    | VWGIKQLQARRVLA    | POOL 2       | HVTN106 Con S | gp160       |
| 574-588    | KQLQARRVLAVERYLK  | POOL 2       | HVTN106 Con S | gp160       |
| 578-592    | ARVLAVERYLKQDQL   | POOL 2       | HVTN106 Con S | gp160       |
| 582-596    | AVERYLKQDQLLGIW   | POOL 2       | HVTN106 Con S | gp160       |
| 586-600    | YLKQDQLLGIWCSG    | POOL 2       | HVTN106 Con S | gp160       |
| 590-604    | QLLGIWCSGLKIC     | POOL 2       | HVTN106 Con S | gp160       |
| 594-608    | GIWCSGLKICTTTV    | POOL 2       | HVTN106 Con S | gp160       |
| 598-612    | CSGLKICTTVPVMS    | POOL 2       | HVTN106 Con S | gp160       |
| 602-616    | LICTTVPVMSNSN     | POOL 2       | HVTN106 Con S | gp160       |
| 606-620    | TVTVPVMSNSNSQD    | POOL 2       | HVTN106 Con S | gp160       |
| 610-624    | WNSNSNSQDEIWD     | POOL 2       | HVTN106 Con S | gp160       |
| 614-628    | WNSNSQDEIWDNHW    | POOL 2       | HVTN106 Con S | gp160       |
| 618-632    | SQDEIWDNHWMEWE    | POOL 2       | HVTN106 Con S | gp160       |
| 622-636    | INDNHWMEWEELIN    | POOL 2       | HVTN106 Con S | gp160       |
| 626-640    | HWMEWEELINNYTD    | POOL 2       | HVTN106 Con S | gp160       |
| 630-644    | EWELINNYTDIYS     | POOL 2       | HVTN106 Con S | gp160       |
| 634-648    | ENNYTDIYSLIE      | POOL 2       | HVTN106 Con S | gp160       |
| 638-652    | YTDIYSLIEESNQ     | POOL 2       | HVTN106 Con S | gp160       |
| 642-656    | IYSLIEESNQEKRN    | POOL 2       | HVTN106 Con S | gp160       |
| 646-660    | IEESNQEKRNQEL     | POOL 2       | HVTN106 Con S | gp160       |
| 650-664    | QNQEKRNQELALLD    | POOL 2       | HVTN106 Con S | gp160       |
| 654-668    | ENQEKRNQELALLD    | POOL 2       | HVTN106 Con S | gp160       |
| 658-672    | QELALLDALLD       | POOL 2       | HVTN106 Con S | gp160       |
| 662-676    | ALDALLDALLD       | POOL 2       | HVTN106 Con S | gp160       |
| 666-680    | WASLWDFITNWL      | POOL 2       | HVTN106 Con S | gp160       |
| 670-684    | WDFITNWLWYIKI     | POOL 2       | HVTN106 Con S | gp160       |
| 674-688    | DFITNWLWYIKIFIM   | POOL 2       | HVTN106 Con S | gp160       |
| 678-692    | WYIKIFIMWGL       | POOL 2       | HVTN106 Con S | gp160       |
| 682-696    | IKIFIMWGLIGL      | POOL 2       | HVTN106 Con S | gp160       |
| 686-700    | IMWGLIGLIVFA      | POOL 2       | HVTN106 Con S | gp160       |
| 690-704    | GGLIGLIVFAVLSI    | POOL 2       | HVTN106 Con S | gp160       |
| 694-708    | GLRIVFAVLSINRV    | POOL 2       | HVTN106 Con S | gp160       |
| 698-712    | VFAVLSINRVROGY    | POOL 2       | HVTN106 Con S | gp160       |
| 702-716    | LSINRVROGYSPLS    | POOL 2       | HVTN106 Con S | gp160       |
| 706-720    | NRVROGYSPLSFQTL   | POOL 2       | HVTN106 Con S | gp160       |
| 710-724    | QGYSPLSFQTLINPN   | POOL 2       | HVTN106 Con S | gp160       |
| 714-728    | PLSFQTLINPNRGP    | POOL 2       | HVTN106 Con S | gp160       |
| 718-732    | QTLINPNRGPDRP     | POOL 2       | HVTN106 Con S | gp160       |
| 722-736    | PNRGPDRPGEIEE     | POOL 2       | HVTN106 Con S | gp160       |
| 726-740    | GPDRPGEIEEGBEQ    | POOL 2       | HVTN106 Con S | gp160       |
| 730-744    | PEGIEEGBEQDRDR    | POOL 2       | HVTN106 Con S | gp160       |
| 734-748    | EEGBEQDRDRSRL     | POOL 2       | HVTN106 Con S | gp160       |
| 738-752    | GBEQDRDRSRLVMP    | POOL 2       | HVTN106 Con S | gp160       |
| 742-756    | RDRSRLVMPFLALA    | POOL 2       | HVTN106 Con S | gp160       |
| 746-760    | RLVMPFLALANDLD    | POOL 2       | HVTN106 Con S | gp160       |
| 750-764    | NFLALANDLDSLC     | POOL 2       | HVTN106 Con S | gp160       |
| 754-768    | ALANDLDSLCSFY     | POOL 2       | HVTN106 Con S | gp160       |
| 758-772    | DLDSLCSFYSHRLR    | POOL 2       | HVTN106 Con S | gp160       |
| 762-776    | SLSFYSHRLRDFIL    | POOL 2       | HVTN106 Con S | gp160       |
| 766-780    | FSYSHRLRDFILIAA   | POOL 2       | HVTN106 Con S | gp160       |
| 770-784    | RDRDFILIAARVEL    | POOL 2       | HVTN106 Con S | gp160       |
| 774-788    | FILIAARVELLGRK    | POOL 2       | HVTN106 Con S | gp160       |
| 778-788    | AARVELLGRKRLR     | POOL 2       | HVTN106 Con S | gp160       |
| 778-792    | VELLGRKRLRWGEA    | POOL 2       | HVTN106 Con S | gp160       |
| 782-796    | GRKRLRWGEALKYL    | POOL 2       | HVTN106 Con S | gp160       |
| 786-800    | LRWGEALKYLWLL     | POOL 2       | HVTN106 Con S | gp160       |
| 790-804    | WALKYLWLLQWQ      | POOL 2       | HVTN106 Con S | gp160       |
| 794-808    | KYLANLQWQQLK      | POOL 2       | HVTN106 Con S | gp160       |
| 798-812    | NLLQWQQLKNSAI     | POOL 2       | HVTN106 Con S | gp160       |
| 802-816    | YQQLKNSAISLLD     | POOL 2       | HVTN106 Con S | gp160       |
| 806-820    | EKNSAISLLDTAI     | POOL 2       | HVTN106 Con S | gp160       |
| 810-824    | SAISLLDTAIAVAE    | POOL 2       | HVTN106 Con S | gp160       |
| 814-828    | LDTAIAVAEAGTDR    | POOL 2       | HVTN106 Con S | gp160       |
| 818-832    | TAIAVAEAGTDRIVE   | POOL 2       | HVTN106 Con S | gp160       |
| 822-836    | VAEAGTDRIVEVQRA   | POOL 2       | HVTN106 Con S | gp160       |
| 826-840    | RDRIVEVQRAACRL    | POOL 2       | HVTN106 Con S | gp160       |

|         |                |          | PRE-IMMUNIZATION                                          | POST-VACCINATION                             |                                              |                                               |  |  |
|---------|----------------|----------|-----------------------------------------------------------|----------------------------------------------|----------------------------------------------|-----------------------------------------------|--|--|
| PUBID   | ARM            | PEPTIDES | V2 T cell Library<br>(antigen-spec cell/10 <sup>6</sup> ) | V2 ex vivo ELISpot<br>(SFU/10 <sup>6</sup> ) | V7 ex vivo ELISpot<br>(SFU/10 <sup>6</sup> ) | V7 cultured ELISpot<br>(SFU/10 <sup>6</sup> ) |  |  |
| 106-003 | ConS           | 606-620  | 3.831 (memory)                                            | <20                                          |                                              |                                               |  |  |
| 106-009 | ConS           | 6-24     | 1.193 (naïve)                                             | <20                                          |                                              |                                               |  |  |
|         |                | 340-354  | 1.012 (memory)                                            | <20                                          | 36.25                                        |                                               |  |  |
| 106-010 | ConS           | 18-32    | 0.607 (memory)                                            | <20                                          |                                              |                                               |  |  |
|         |                | 22-36    | 1.828 (memory)                                            | <20                                          |                                              |                                               |  |  |
|         |                | 165-179  | 1.217 (memory)                                            | <20                                          |                                              |                                               |  |  |
| 106-039 | ConS           | 570-584  | 1.565 (memory)                                            | <20                                          |                                              | 100.00                                        |  |  |
|         |                | 34-48    | 0.773 (naïve)                                             | <20                                          |                                              | 47.92                                         |  |  |
|         |                | 38-52    | 0.773 (naïve)                                             | <20                                          |                                              |                                               |  |  |
|         |                | 114-128  | 0.773 (naïve)                                             | <20                                          |                                              |                                               |  |  |
|         |                | 247-261  | 1.013 (memory)                                            | <20                                          |                                              |                                               |  |  |
|         |                | 410-424  | 0.773 (naïve)                                             | <20                                          |                                              |                                               |  |  |
|         |                | 418-432  | 1.013 (memory)                                            | <20                                          |                                              |                                               |  |  |
|         |                | 422-436  | 0.506 (memory)                                            | <20                                          |                                              |                                               |  |  |
|         |                | 546-560  | 0.506 (memory)                                            | <20                                          | 36.88                                        | 25.00                                         |  |  |
|         |                | 558-572  | 0.773 (naïve)                                             | <20                                          |                                              | 31.25                                         |  |  |
|         |                | 562-576  | 0.773 (naïve)                                             | <20                                          |                                              |                                               |  |  |
|         |                | 106-060  | ConS                                                      | 570-584                                      | 3.115/0.506 (naïve/memory)                   | <20                                           |  |  |
|         |                |          |                                                           | 618-632                                      | 0.506 (memory)                               | <20                                           |  |  |
|         |                |          |                                                           | 638-652                                      | 1.013 (memory)                               | 22.92                                         |  |  |
| 658-672 | 0.773 (naïve)  |          |                                                           | <20                                          |                                              |                                               |  |  |
| 666-680 | 0.773 (naïve)  |          |                                                           | <20                                          |                                              |                                               |  |  |
| 714-728 | 2.331 (naïve)  |          |                                                           | <20                                          |                                              |                                               |  |  |
| 770-784 | 0.506 (memory) |          |                                                           | <20                                          |                                              | 114.59                                        |  |  |
| 790-804 | 0.773 (naïve)  |          |                                                           | <20                                          |                                              |                                               |  |  |
| 794-808 | 0.773 (naïve)  |          |                                                           | <20                                          |                                              |                                               |  |  |
| 806-820 | 0.773 (naïve)  |          |                                                           | <20                                          |                                              |                                               |  |  |
|         |                | 842-856  | 0.773 (naïve)                                             | <20                                          |                                              | 137.50                                        |  |  |
| 106-091 | ConS           | 321-334  | 0.452 (memory)                                            | <20                                          | 85.50                                        | 79.17                                         |  |  |
| 106-013 | Nat B          | 570-584  | 4.141 (naïve)                                             | <20                                          |                                              |                                               |  |  |
|         |                | 418-432  | 0.323 (memory)                                            | <20                                          |                                              |                                               |  |  |
| 106-032 | Nat B          | 422-436  | 0.323 (memory)                                            | <20                                          |                                              |                                               |  |  |
|         |                | 562-576  | 0.323 (memory)                                            | <20                                          |                                              |                                               |  |  |
| 106-042 | Nat B          | 6-24     | 1.312 (memory)                                            | <20                                          |                                              |                                               |  |  |
|         |                | 42-56    | 0.654 (memory)                                            | <20                                          | 39.84                                        |                                               |  |  |
|         |                | 173-187  | 0.654 (memory)                                            | <20                                          |                                              |                                               |  |  |
| 106-058 | Nat B          | 458-472  | 1.828 (memory)                                            | <20                                          |                                              |                                               |  |  |
|         |                | 570-584  | 1.026 (naïve)                                             | <20                                          | 30.00                                        |                                               |  |  |
|         |                | 830-844  | 6.975 (memory)                                            | <20                                          |                                              |                                               |  |  |
| 106-104 | Mosaic         | 482-496  | 1.28 (naïve)                                              | 83.33                                        |                                              |                                               |  |  |
|         |                | 169-183  | 1.214 (naïve)                                             | <20                                          |                                              |                                               |  |  |
| 106-006 | Placebo        | 634-648  | 1.163 (memory)                                            | 30.00                                        |                                              |                                               |  |  |
|         |                | 742-756  | 1.214 / 1.163 (naïve/memory)                              | <20                                          | 131.53                                       |                                               |  |  |
| 106-069 | Placebo        | 247-261  | 1.787 (memory)                                            | <20                                          |                                              |                                               |  |  |
|         |                | 486-500  | 1.787 (memory)                                            | <20                                          |                                              |                                               |  |  |
|         |                | 742-756  | 3.584 (memory)                                            | <20                                          |                                              |                                               |  |  |
| 106-071 | Placebo        | 90-104   | 0.72 (naïve)                                              | <20                                          |                                              |                                               |  |  |
|         |                | 106-120  | 0.72 (naïve)                                              | <20                                          |                                              |                                               |  |  |

**Table S3. Ex vivo IFN- $\gamma$  ELISpot data from donors in whom pre-immunization responses were detected at V2 compared with the corresponding T cell library data at V2 and the corresponding IFN- $\gamma$  ELISpot data at V7.**



1. Santra, S., et al., *A centralized gene-based HIV-1 vaccine elicits broad cross-clade cellular immune responses in rhesus monkeys*. PNAS, 2008. **105**(30): p. 10489-10494.
2. Bull, M., et al., *Defining blood processing parameters for optimal detection of cryopreserved antigen-specific responses for HIV vaccine trials*. J Immunol Methods, 2007. **322**(1-2): p. 57-69.
3. Champion, S.L., et al., *Proteome-wide analysis of HIV-specific naive and memory CD4(+) T cells in unexposed blood donors*. J Exp Med, 2014. **211**(7): p. 1273-80.
4. Geiger, R., et al., *Human naive and memory CD4+ T cell repertoires specific for naturally processed antigens analyzed using libraries of amplified T cells*. J Exp Med, 2009. **206**(7): p. 1525-1534.
5. Lindestam Arlehamn, C.S., et al., *Memory T cells in latent Mycobacterium tuberculosis infection are directed against three antigenic islands and largely contained in a CXCR3+CCR6+ Th1 subset*. PLoS Pathog, 2013. **9**(1): p. e1003130.
6. Mele, F., et al., *Phenotype and specificity of T cells in primary human cytomegalovirus infection during pregnancy: IL-7Rpos long-term memory phenotype is associated with protection from vertical transmission*. PLoS One, 2017. **12**(11): p. e0187731.
7. Harrell, F.E., *Regression Modeling Strategies: With Applications to Linear Models, Logistic Regression, and Survival Analysis.*, ed. S.S.B. Media. 2013: Springer.
8. Precopio, M.L., et al., *Optimizing Peptide Matrices for Identifying T-Cell Antigens*. Cytometry A, 2008. **73A**: p. 1071-1078.
9. Goonetilleke, N., et al., *Induction of multifunctional human immunodeficiency virus type 1 (HIV-1)-specific T cells capable of proliferation in healthy subjects by using a prime-boost regimen of DNA- and modified vaccinia virus Ankara-vectored vaccines expressing HIV-1 Gag coupled to CD8+ T-cell epitopes*. J Virol, 2006. **80**(10): p. 4717-28.
10. Quigley, M.F., et al., *Unbiased molecular analysis of T cell receptor expression using template-switch anchored RT-PCR*. Curr Protoc Immunol, 2011. **10**(10.33).
11. Price, D.A., et al., *Avidity for antigen shapes clonal dominance in CD8+ T cell populations specific for persistent DNA viruses*. J Exp Med, 2005. **202**(10): p. 1349-61.

12. Lefranc, M.P., *IMGT, the international ImMunoGeneTics database*. *Nucleic Acids Res*, 2003. **31**(1): p. 307-10.
